# Supplementary material for: The Development of Advanced Fluorescent Tracers Aimed at Drill Cuttings Labelling and Depth Correlation via Injection with Oil-Based Drilling Mud
Source: MDPI journal article supplement (doi:10.3390/pr11113197), 2023-11-09
Supplement: s1 [file s1]

## *Supplementary Information*

# **The Development of Advanced Fluorescent Tracers Aimed at Drill Cuttings Labelling and Depth Correlation via Injection with Oil-Based Drilling Mud**

Vladimir Khmelnitskiy <sup>1</sup>, Hassan S. Alqahtani <sup>2</sup>, Hyung Kwak <sup>2</sup> and Vera Solovyeva <sup>1,\*</sup>

<sup>1</sup> Aramco Innovations, Bld. 1, 9 Varshavskoe Highway, 117105 Moscow, Russia;  
vladimir.khmelnitskiy@aramcoinnovations.com

<sup>2</sup> Saudi Aramco—EXPEC ARC (Advanced Research Center), Dhahran 31311, Saudi Arabia

\* Correspondence: vera.solovyeva@aramcoinnovations.com

### TABLE OF CONTENTS:

|                                                                                            |   |
|--------------------------------------------------------------------------------------------|---|
| Table S1. Rheological properties of OBM in the presence of Tracer additives 1-20 wt.%..... | 2 |
| Table S2. Shale-particles and tags disintegration test by hot rolling.....                 | 3 |

Table S1. Rheological measurements for OBM in the presence of Tracer additives 1-20 wt.%.

|                                            |                        | OBM          | SAP (Rhodamine) |      |      |      | SiO <sub>2</sub> (fluorescein) |      |      |      |
|--------------------------------------------|------------------------|--------------|-----------------|------|------|------|--------------------------------|------|------|------|
|                                            |                        |              | 1%              | 5%   | 10%  | 20%  | 1%                             | 5%   | 10%  | 20%  |
| Mineral oil                                | ml                     | 145          | 145             | 145  | 145  | 145  | 145                            | 145  | 145  | 145  |
| Hydrophobized clay                         | g                      | 3            | 3               | 3    | 3    | 3    | 3                              | 3    | 3    | 3    |
| Primary emulsifier                         | ml                     | 4            | 4               | 4    | 4    | 4    | 4                              | 4    | 4    | 4    |
| Lime Ca(OH) <sub>2</sub>                   | g                      | 3            | 3               | 3    | 3    | 3    | 3                              | 3    | 3    | 3    |
| Hydrophobized agent                        | ml                     | 1            | 1               | 1    | 1    | 1    | 1                              | 1    | 1    | 1    |
| Rheology modifier                          | ml                     | 1            | 1               | 1    | 1    | 1    | 1                              | 1    | 1    | 1    |
| Filtration reducer                         | g                      | 2.5          | 2.5             | 2.5  | 2.5  | 2.5  | 2.5                            | 2.5  | 2.5  | 2.5  |
| Calcium chloride brine<br>$\rho=1.25$ g/ml | ml                     | 47.5         | 47.5            | 47.5 | 47.5 | 47.5 | 47.5                           | 47.5 | 47.5 | 47.5 |
| CaCO <sub>3</sub>                          | g                      | 70           | 70              | 70   | 70   | 70   | 70                             | 70   | 70   | 70   |
| Tracers                                    | g                      |              | 2.4             | 12   | 24   | 48   | 2.4                            | 12   | 24   | 48   |
| <b>Readings</b>                            | <b>t</b>               | <b>49 °C</b> |                 |      |      |      |                                |      |      |      |
| $\rho$ , g/cm <sup>3</sup>                 | g/ml                   | 1.15         | 1.15            | 1.17 | 1.19 | 1.19 | 1.16                           | 1.17 | 1.18 | 1.21 |
| 600 RPM                                    |                        | 77           | 78              | 80   | 79   | 80   | 81                             | 90   | 100  | 145  |
| 300 RPM                                    |                        | 54           | 54              | 57   | 56   | 53   | 56                             | 65   | 70   | 99   |
| 200 RPM                                    |                        | 45           | 44              | 48   | 48   | 43   | 45                             | 54   | 58   | 80   |
| 100 RPM                                    |                        | 34           | 33              | 36   | 36   | 31   | 34                             | 41   | 44   | 59   |
| 6 RPM                                      |                        | 18           | 16              | 19   | 19   | 14   | 17                             | 25   | 24   | 28   |
| 3 RPM                                      |                        | 17           | 15              | 17   | 18   | 13   | 16                             | 24   | 22   | 26   |
| Gel strength 10 sec.                       | lbs/100ft <sup>2</sup> | 18           | 15              | 18   | 18   | 13   | 17                             | 24   | 22   | 26   |
| Gel strength 10 min.                       | lbs/100ft <sup>2</sup> | 21           | 19              | 21   | 20   | 16   | 22                             | 31   | 28   | 32   |
| Plastic viscosity                          | mPa·sec                | 23           | 24              | 23   | 23   | 27   | 25                             | 25   | 30   | 46   |
| Yield point                                | lbs/100ft <sup>2</sup> | 31           | 30              | 34   | 33   | 26   | 31                             | 40   | 40   | 53   |
| Electrical stability                       | V                      | 800          | 650             | 970  | 650  | 880  | 780                            | 600  | 430  | 185  |

Table S2. Shale-particles and tags disintegration test by hot rolling.

| Type of tracers                                     | Sample with no drill cuttings                     |                                                   |                                                                                    | Sample with drill cuttings (20 g in 350 ml OBM)                       |                                                                                   |                                                                                   |                                                                                      |
|-----------------------------------------------------|---------------------------------------------------|---------------------------------------------------|------------------------------------------------------------------------------------|-----------------------------------------------------------------------|-----------------------------------------------------------------------------------|-----------------------------------------------------------------------------------|--------------------------------------------------------------------------------------|
|                                                     | The mass of the recovered tracers on the sieve, g | The mass of the recovered tracers on the sieve, % | Image of a sieve with recovered tracers                                            | The mass of the recovered tracers with drill cuttings on the sieve, g | The mass of the recovered drill cuttings without the mass of recovered tracers, g | The mass of the recovered drill cuttings without the mass of recovered tracers, % | Image of a sieve with a recovered tracers and drill cuttings.                        |
| Without tracers                                     | -                                                 | -                                                 | -                                                                                  | 8.68                                                                  | 8.68                                                                              | 44.93                                                                             |   |
| 5 wt.% SiO <sub>2</sub> -Flu (22.5 g in 350 ml OBM) | 0.02                                              | 0.09                                              |   | 15.06                                                                 | 15.04                                                                             | 77.85                                                                             |   |
| 5 wt.% SAP-Rh (22.5 g in 350 ml OBM)                | 22.63                                             | 100.00                                            |   | 27.91                                                                 | 5.41                                                                              | 28.00                                                                             |   |
| 5 wt.% SAP-flu (22.5 g in 350 ml OBM)               | 21.66                                             | 96.27                                             |  | 29.08                                                                 | 7.42                                                                              | 38.41                                                                             |  |
